# Supplementary material for: Interaction Models and Molecular Simulation Systems of Steel–Organic Friction Modifier Interfaces
Source: Springer Nature journal article supplement (doi:10.1007/s11249-020-01384-9), 2021-01-12
Supplement: 11249_2020_1384_MOESM1_ESM.pdf [file 11249_2020_1384_MOESM1_ESM.pdf]

# Supplementary information

## Interaction models and molecular simulation systems of steel - organic friction modifier interfaces

Arkadii Pominov\*    Johannes Mueller-Hillebrand\*  
Johannes Traeg\*    Dirk Zahn<sup>†,\*</sup>

\*Lehrstuhl für Theoretische Chemie/ Computer Chemie Centrum  
Friedrich-Alexander Universität Erlangen-Nürnberg  
Nägelsbachstraße 25, 91052 Erlangen, Germany

<sup>†</sup>dirk.zahn@fau.de

---

Source Code 1: The source code in Python for generation of the OFM monolayers with various number of molecules.

---

```
1 from math import isclose
2
3 class Lattice2D:
4     """Class to describe a 2D periodic lattice
5     """
6
7     def __init__(self, basis, constants, lims):
8         """Sets up the parameters, necessary
9         to define a 2D lattice and generates the lattice
10
11         Arguments:
12         basis {list of (x,y)-tuples} -- in unit cell coordinates,
13             e.g. [(0, 0), (0.5, 0.5)]
14         constants {dict with keys ("a" and "b") and floats as values} --
15             e.g. {"a": 1.0, "b": 1.0}
16         the user must ensure these fit integer number of times
17         in both directions
18         lims {dict with keys ("x" and "y") and tuples as values} --
19             {"x": (x_min, x_max), "y": (y_min, y_max)},
20         describe the boundaries of the slab/surface
21         """
22         self.basis = basis
23         self.constants = constants
24         self.xlims = lims["x"]
25         self.ylims = lims["y"]
26         # List of tuples (x,y) for all points
27         self.coordinates = None
28         # Number of points on the lattice
29         self.number = None
30         # hexagonal criterion
31         # (lattice_a_constant**2+lattice_b_constant**2)**0.5/2/lattice_a_constant
32         # describes deviation from the hexagonal lattice
33         # and ==1 if a and b equal
34         self.hexcrit = None
35         self.__generate()
36
37     def __generate(self):
38         """
39         Generates coordinates of points for Lattice2D
```

---

```

40     """
41     x_min, x_max = self.xlims
42     x_cur = x_min
43     y_min, y_max = self.ylims
44     self.coordinates = []
45     for xbasis, ybasis in self.basis:
46         # to prevent going beyond the given boundaries
47         while not isclose(x_cur, x_max, rel_tol=0.01):
48             y_cur = y_min
49             while not isclose(y_cur, y_max, rel_tol=0.01):
50                 self.coordinates.append(
51                     (
52                         x_cur + xbasis * self.constants["a"],
53                         y_cur + ybasis * self.constants["b"],
54                     )
55                 )
56                 y_cur += self.constants["b"]
57                 x_cur += self.constants["a"]
58             x_cur = x_min
59     self.number = len(self.coordinates)
60     self.hexcrit = (
61         (self.constants["a"] ** 2 + self.constants["b"] ** 2) ** 0.5
62         / 2
63         / self.constants["a"]
64     )
65
66
67 # define surface dimensions
68 x_dim = 100.71
69 y_dim = 34.887
70 # only discrete lattice constants are possible when periodicity is maintained
71 nmax_x = 35 # 1/nmax_x is the smallest periodic interval in x
72 nmax_y = 12 # 1/nmax_y is the smallest periodic interval in y
73 lattice_a_constants = [x_dim / (i + 1) for i in range(1, nmax_x)]
74 lattice_b_constants = [y_dim / (i + 1) for i in range(1, nmax_y)]
75
76 # to choose only sensible lattices
77 criteria = {
78     "lo_number": 1,
79     "hi_number": 190,
80     "hex_criterion_lo": 0.8,
81     "hex_criterion_hi": 1.2,
82 }
83 hex_basis = [(0, 0), (0.5, 0.5)]

```

---

```
84
85 lattices = []
86
87 for a in lattice_a_constants:
88     for b in lattice_b_constants:
89         lattice = Lattice2D(
90             hex_basis, {"a": a, "b": b}, {"x": (0, x_dim), "y": (0, y_dim)}
91         )
92         # only accept the generated lattice if criteria are fulfilled
93         if (
94             criteria["lo_number"] < lattice.number < criteria["hi_number"]
95         ) and (
96             criteria["hex_criterion_lo"]
97             < lattice.hexcrit
98             < criteria["hex_criterion_hi"]
99         ):
100             lattices.append(lattice)
101         else:
102             continue
103 # sort the generated lattices by the number of points in them
104 sorted_lattices = sorted(lattices, key=lambda lattice: lattice.number)
```

---



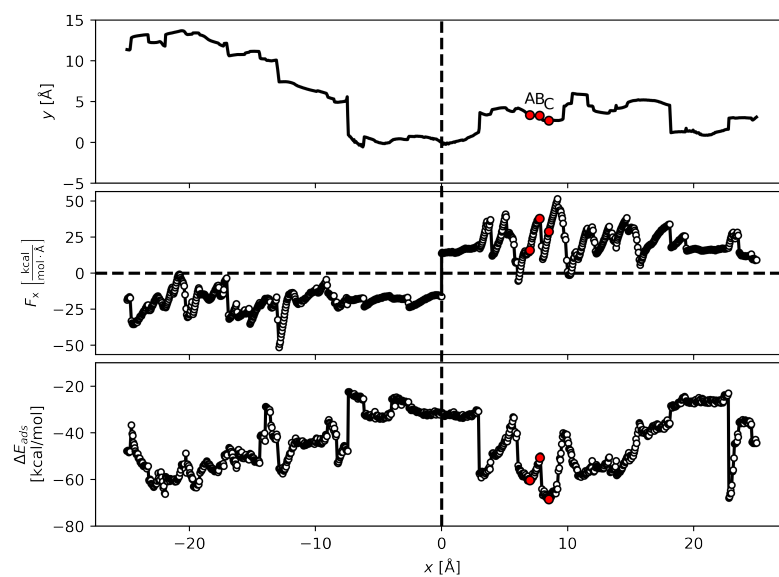

Acetic acid

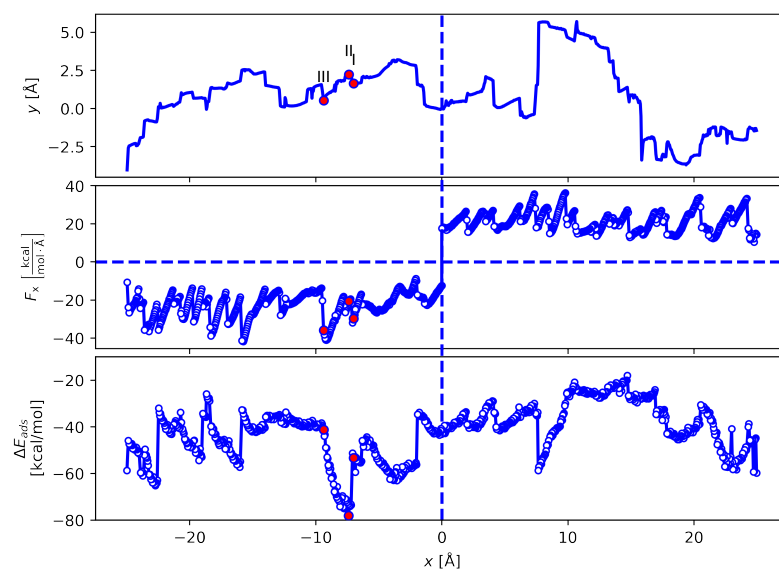

Glycerol monoacetate

Figure s1: Pulling the molecules along the surface was performed from  $x = 0$  to  $x = 2.5$  nm and from  $x = 0$  to  $x = -2.5$  nm. Profiles of the orthogonal ( $y$ ) coordinate, pulling force and adsorption energy are shown as functions of  $x$ . The indices A-C and I-III denote the configurations which are illustrated in fig. s2 and s3, respectively.

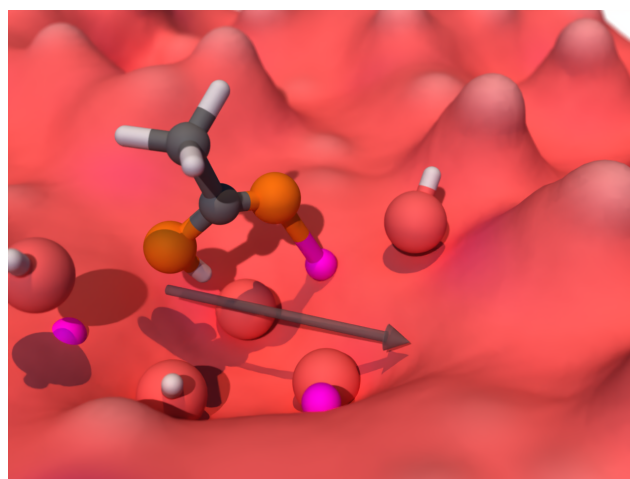

A

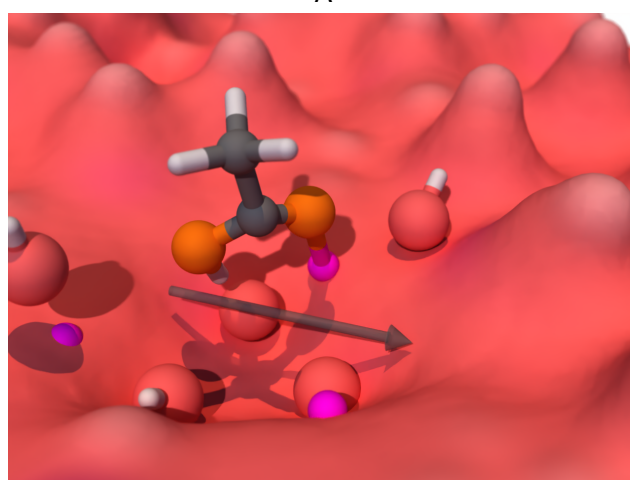

B

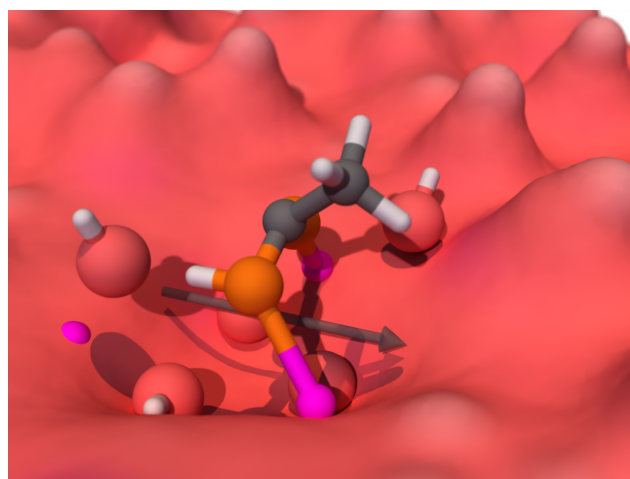

C

Figure s2: Bond stretching (A→B) and reorganization (B→C) of acetic acid upon pulling along the surface. The arrows indicate the pulling direction.

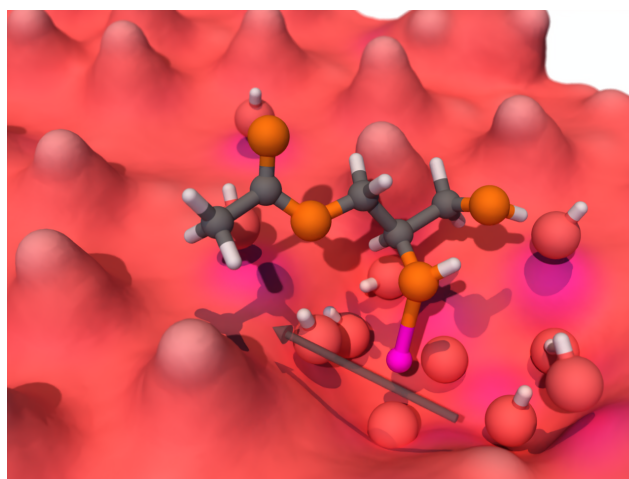

I

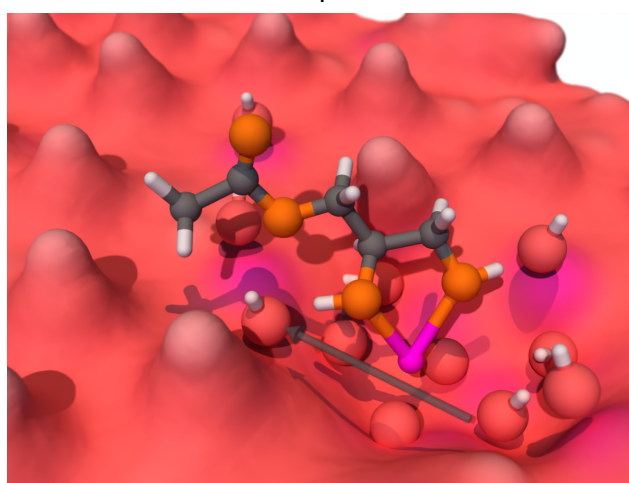

II

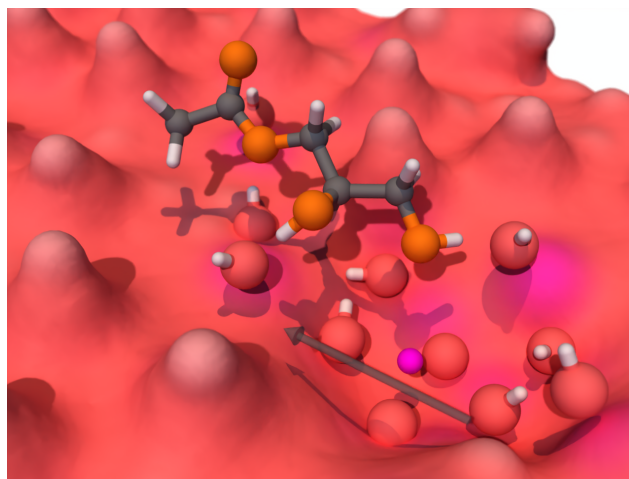

III

Figure s3: Bond stretching (I→II) and reorganization (II→III) of glycerol monoacetate upon pulling along the surface. The arrows indicate the pulling direction.
